# Supplementary material
Source: PubMed Central journal article supplement (PMC6440308)
Supplement: JSLHR-61-2950-s002.pdf [file JSLHR-61-2950-s002.pdf]

**Supplemental Material S2.** Summary scores on all cognitive measures for the children with developmental language disorder (DLD) and typically developing (TD) controls, and Cohen's *d* (standardized mean difference) between the groups.

| <b>Factors/measures</b>                     | <b>DLD</b><br>( <i>n</i> = 117) | <b>TD</b><br>( <i>n</i> = 117) | <b>Cohen's <i>d</i></b> |
|---------------------------------------------|---------------------------------|--------------------------------|-------------------------|
| <b>Fluid reasoning</b>                      |                                 |                                |                         |
| Leiter Figure Ground <sup>1</sup>           |                                 |                                |                         |
| <i>M</i> (PR)                               | 21.10                           | 23.11                          | -0.53                   |
| <i>SD</i>                                   | 3.53                            | 4.07                           |                         |
| Range                                       | 14–29                           | 11–30                          |                         |
| Leiter Sequential Order <sup>2</sup>        |                                 |                                |                         |
| <i>M</i> (PR)                               | 28.47                           | 34.13                          | -0.64                   |
| <i>SD</i>                                   | 9.77                            | 7.92                           |                         |
| Range                                       | 7–44                            | 8–47                           |                         |
| Leiter Repeated Patterns <sup>3</sup>       |                                 |                                |                         |
| <i>M</i> (PR)                               | 19.67                           | 21.94                          | -0.56                   |
| <i>SD</i>                                   | 3.84                            | 4.26                           |                         |
| Range                                       | 11–27                           | 10–27                          |                         |
| <b>Controlled attention</b>                 |                                 |                                |                         |
| Sustained Attention <sup>4</sup>            |                                 |                                |                         |
| <i>M</i> ( <i>P<sub>r</sub></i> )           | .76                             | .82                            | -0.36                   |
| <i>SD</i>                                   | .19                             | .14                            |                         |
| Range                                       | .10–1.0                         | .26–1.0                        |                         |
| Attention Switching <sup>5</sup>            |                                 |                                |                         |
| <i>M</i> (percent correct)                  | 79.0                            | 86.4                           | -0.54                   |
| <i>SD</i>                                   | 15.16                           | 12.24                          |                         |
| Range                                       | 42–100                          | 14–100                         |                         |
| <b>Complex working memory</b>               |                                 |                                |                         |
| WJ-AWM <sup>6</sup>                         |                                 |                                |                         |
| <i>M</i> (trials correct)                   | 4.80                            | 8.09                           | -1.05                   |
| <i>SD</i>                                   | 2.79                            | 3.40                           |                         |
| Range                                       | 0–11                            | 0–17                           |                         |
| High–Low <sup>7</sup>                       |                                 |                                |                         |
| <i>M</i> (percent trials correct)           | 54.55                           | 72.05                          | -0.90                   |
| <i>SD</i>                                   | 19.24                           | 19.48                          |                         |
| Range                                       | 3–90                            | 18–100                         |                         |
| <b>Long-term memory: Language knowledge</b> |                                 |                                |                         |
| TNL-R <sup>8</sup>                          |                                 |                                |                         |
| <i>M</i> (raw score)                        | 27.97                           | 31.73                          | -0.98                   |
| <i>SD</i>                                   | 4.12                            | 3.53                           |                         |
| Range                                       | 16–35                           | 18–37                          |                         |
| TNL-E <sup>9</sup>                          |                                 |                                |                         |
| <i>M</i> (raw score)                        | 37.36                           | 50.77                          | -1.08                   |
| <i>SD</i>                                   | 12.63                           | 12.14                          |                         |
| Range                                       | 1–70                            | 10–83                          |                         |

- <sup>1</sup>Figure Ground subtest from Leiter International Performance Scale–Revised: Total raw score (Roid & Miller, 1997).
- <sup>2</sup>Sequential Order subtest from Leiter International Performance Scale–Revised: Total raw score.
- <sup>3</sup>Repeated Patterns subtest from Leiter International Performance Scale–Revised: Total raw score.
- <sup>4</sup>Sustained Attention (adapted from Gordon, McClure, & Aylward, 1996): PR discrimination index (PR = Hits – False Alarms).
- <sup>5</sup>Auditory Attention Switching: Percent trials correct (Evans, Gillam, & Montgomery, 2018).
- <sup>6</sup>Auditory Working Memory: Woodcock-Johnson III: Total number of items correct (Woodcock, McGrew, & Mather, 2001).
- <sup>7</sup>High–Low Task: Percent trials correct (Magimairaj & Montgomery, 2012, 2013).
- <sup>8</sup>Test of Narrative Language–Receptive: Total raw score (Gillam & Pearson, 2004).
- <sup>9</sup>Test of Narrative Language–Expressive: Total raw score.

## References

- Evans, J. L., Gillam, R. B., & Montgomery, J. W. (2018). Cognitive predictors of spoken word recognition in children with and without developmental language disorders. *Journal of Speech, Language, and Hearing Research, 61*, 1409–1425.
- Gillam, R. B., & Pearson, N. (2004). *Test of Narrative Language*. Austin, TX: Pro-Ed.
- Gordon, M., McClure, F. D., & Aylward, G. P. (1996). *Gordon Diagnostic System interpretive guide*. De Witt, NY: GSI Publications.
- Magimairaj, B. M., & Montgomery, J. W. (2012). Children's verbal working memory: Relative importance of storage, general processing speed, and domain-general controlled attention. *Acta Psychologica, 140*, 196–207.
- Magimairaj, B. M., & Montgomery, J. W. (2013). Examining the relative contribution of memory updating, attention focus switching, and sustained attention to children's verbal working memory span. *Child Development Research, 2013*, Article ID 763808. <https://doi.org/10.1155/2013/763808>
- Roid, G., & Miller, L. (1997). *Leiter International Performance Scale–Revised*. Wood Dale, IL: Stoelting.
- Woodcock, R. W., McGrew, K. S., & Mather, N. (2001). *Woodcock-Johnson–III Tests of Achievement*. Rolling Meadows, IL: Riverside Publishing
