# Supplementary material
Source: PubMed Central journal article supplement (PMC6440308)
Supplement: JSLHR-61-2950-s003.pdf [file JSLHR-61-2950-s003.pdf]

**Supplemental Material S3.** Pearson correlations among the individual cognitive processing measures in the GEM (Gillam–Evans–Montgomery) model (groups combined).

|              | Cognitive measure |      |      |      |      |      |      |      |
|--------------|-------------------|------|------|------|------|------|------|------|
|              | 1                 | 2    | 3    | 4    | 5    | 6    | 7    | 8    |
| 1. Leiter FG | 1.00              |      |      |      |      |      |      |      |
| 2. Leiter SO | .53               | 1.00 |      |      |      |      |      |      |
| 3. Leiter RP | .52               | .57  | 1.00 |      |      |      |      |      |
| 4. Sus Attn  | .36               | .40  | .41  | 1.00 |      |      |      |      |
| 5. Attn SW   | .29               | .46  | .42  | .47  | 1.00 |      |      |      |
| 6. High–Low  | .44               | .54  | .52  | .46  | .46  | 1.00 |      |      |
| 7. WJ-AWM    | .45               | .47  | .47  | .37  | .39  | .59  | 1.00 |      |
| 8. TNL-REC   | .35               | .33  | .44  | .32  | .36  | .48  | .56  | 1.00 |
| 9. TNL-EXP   | .35               | .37  | .44  | .28  | .33  | .42  | .54  | .59  |

*Note.* Leiter FG = Figure Ground task from Leiter International Performance Scale–Revised (Roid & Miller, 1997); Leiter SO = Sequential Order task from Leiter International Performance Scale–Revised; Leiter RP = Repeated Patterns task from Leiter International Performance Scale–Revised; Sust Attn = Sustained Attention task (adapted from Gordon, McClure, & Aylward, 1996); Attn SW = Attention Switching task (Evans, Gillam, & Montgomery, 2018); WJ-AWM = Woodcock-Johnson III Auditory Working Memory task (Woodcock, McGrew, & Mather, 2001); High–Low = High–Low working memory task (Magimairaj & Montgomery, 2012, 2013); TNL-REC = Test of Narrative Language Receptive (Comprehension) tasks (Gillam & Pearson, 2004); TNL-EXP = Test of Narrative Language Production (Expressive) tasks.

**References**

Evans, J. L., Gillam, R. B., & Montgomery, J. W. (2018). Cognitive predictors of spoken word recognition in children with and without developmental language disorders. *Journal of Speech, Language, and Hearing Research, 61*, 1409–1425.

Gillam, R. B., & Pearson, N. (2004). *Test of Narrative Language*. Austin, TX: Pro-Ed.

Gordon, M., McClure, F. D., & Aylward, G. P. (1996). *Gordon Diagnostic System interpretive guide*. De Witt, NY: GSI Publications.

Magimairaj, B. M., & Montgomery, J. W. (2012). Children's verbal working memory: Relative importance of storage, general processing speed, and domain-general controlled attention. *Acta Psychologica, 140*, 196–207.

Magimairaj, B. M., & Montgomery, J. W. (2013). Examining the relative contribution of memory updating, attention focus switching, and sustained attention to children's verbal working memory span. *Child Development Research, 2013*, Article ID 763808. <https://doi.org/10.1155/2013/763808>

Roid, G., & Miller, L. (1997). *Leiter International Performance Scale–Revised*. Wood Dale, IL: Stoelting.

Woodcock, R. W., McGrew, K. S., & Mather, N. (2001). *Woodcock-Johnson–III Tests of Achievement*. Rolling Meadows, IL: Riverside Publishing.
